# Supplementary material for: Transcriptional profiling defines dynamics of parasite tissue sequestration during malaria infection
Source: PubMed Central journal article supplement (PMC4342211; doi:10.1186/s13073-015-0133-7), 2015-02-27
Supplement: 13073_2015_133_MOESM10_ESM.pdf [file 13073_2015_133_MOESM10_ESM.pdf]

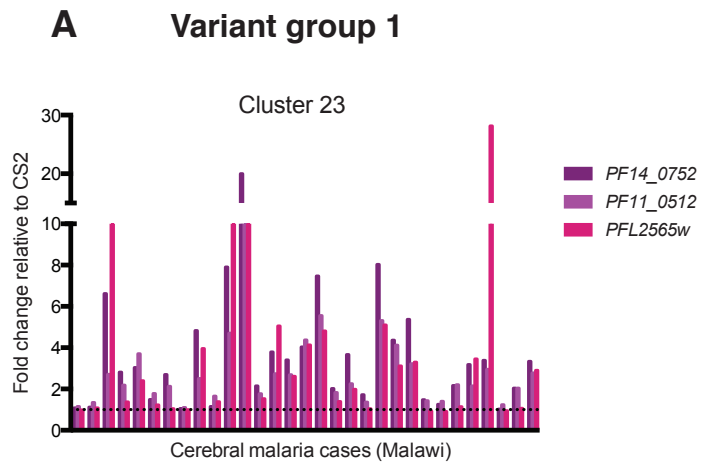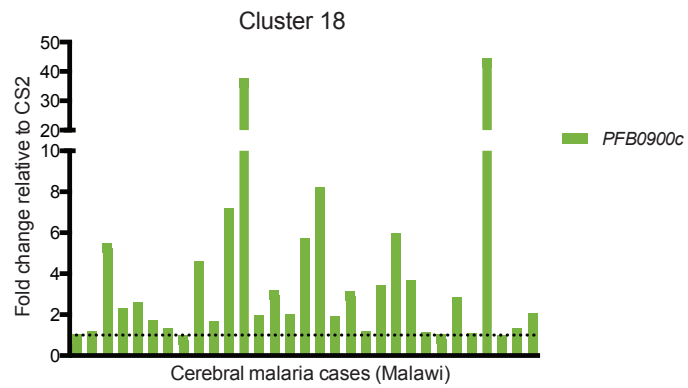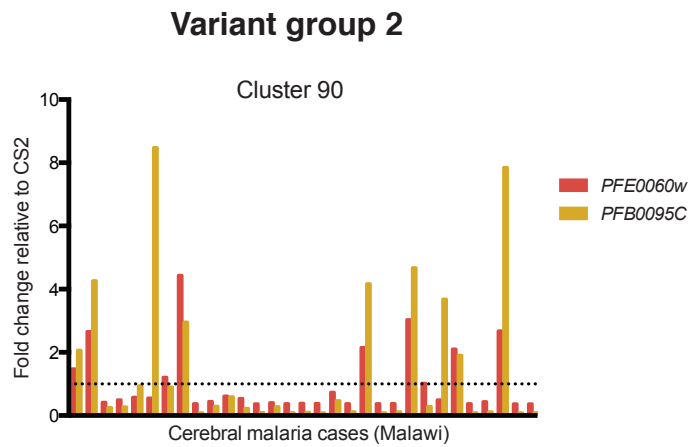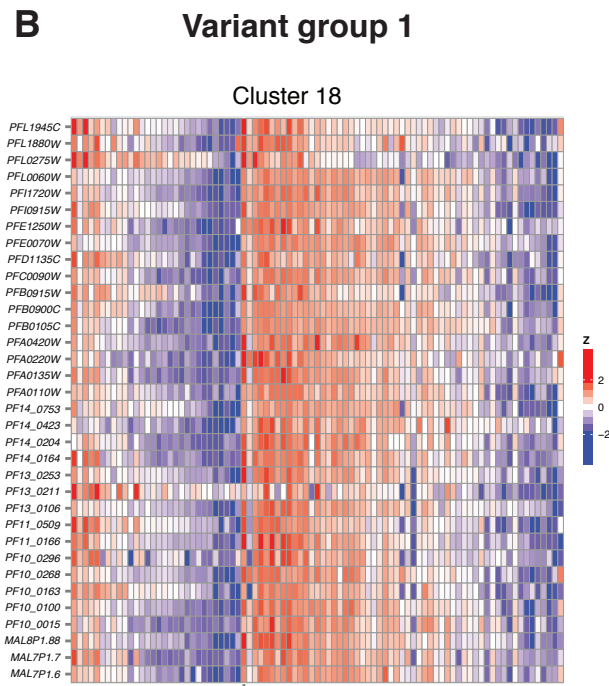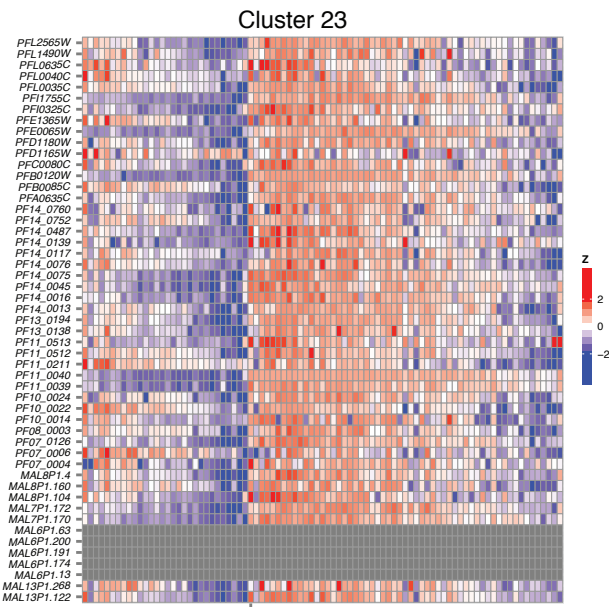

Uncomplicated malaria (Joice et al)      Cerebral malaria (Milner et al)

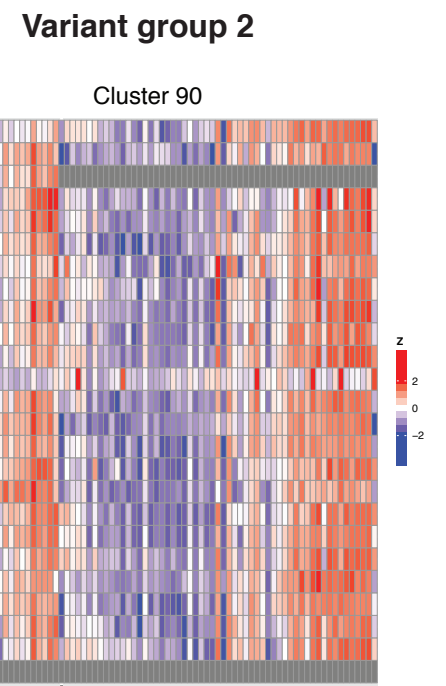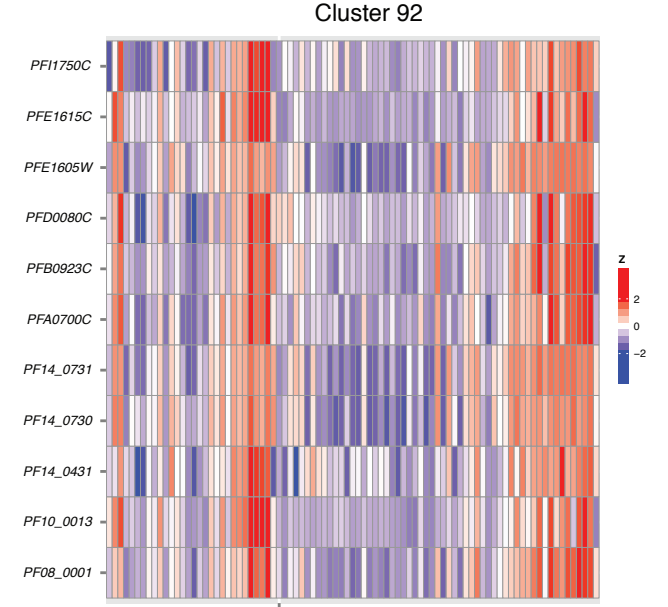

Uncomplicated malaria (Joice et al)      Cerebral malaria (Milner et al)
